# Supplementary material for: Multilevel Regression for Small-Area Estimation of Mammography Use in the United States, 2014
Source: Oxford University Press journal article supplement (doi:10.1158/1055-9965.epi-18-0367), 2018-10-01
Supplement: 10559965epi180367-sup-199603_3_supp_5023973_phwnlk.docx [file 10559965epi180367-sup-199603_3_supp_5023973_phwnlk.docx]

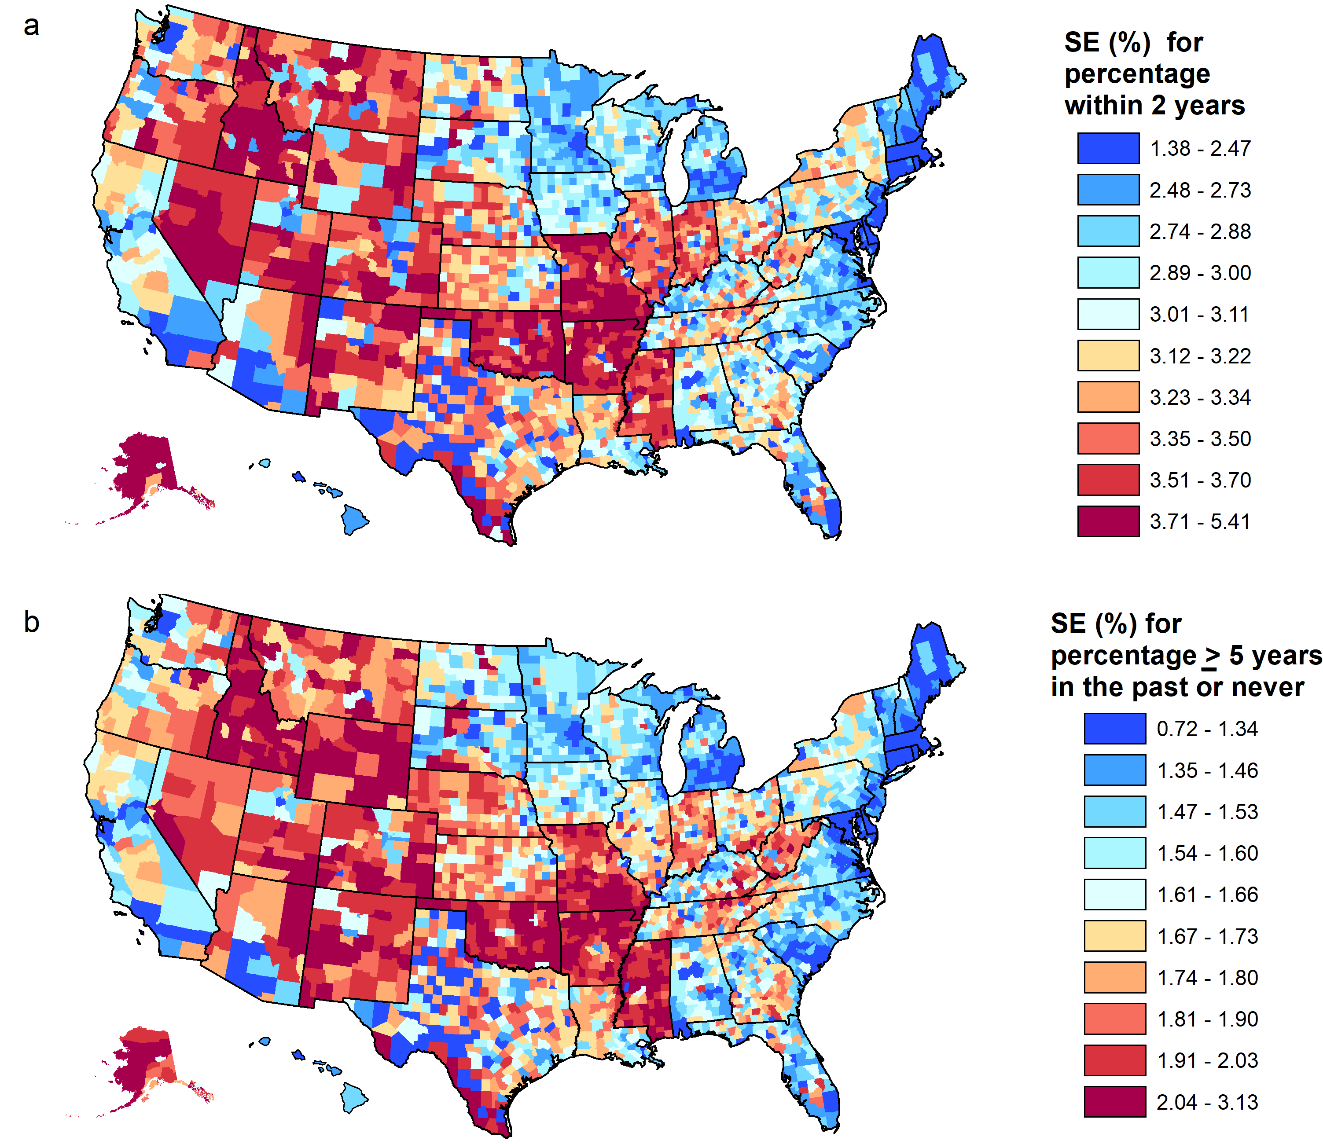


Supplementary Fig. S1. Model-based county-level mean estimates (%) of predicted standard errors of mammography use: a. being up-to-date (<2 years). b. rarely or never had a mammogram (having had a mammogram 5+ years in the past or never). The county percentage-ranges shown on the right were aggregated by deciles, and a different color was assigned in the legend to each decile.
