# Supplementary material for: Multilevel Regression for Small-Area Estimation of Mammography Use in the United States, 2014
Source: Oxford University Press journal article supplement (doi:10.1158/1055-9965.epi-18-0367), 2018-10-01
Supplement: 10559965epi180367-sup-199603_3_supp_5023974_prwnlk.docx [file 10559965epi180367-sup-199603_3_supp_5023974_prwnlk.docx]

**Supplementary data**

**Table S1.** BRFSS direct estimates of demographic characteristics (unadjusted) for up-to-date (within 2 years) mammography by NCHS metropolitan and nonmetropolitan county population size

|  | Metropolitan a | | | | Nonmetropolitan b | | | |
| --- | --- | --- | --- | --- | --- | --- | --- | --- |
|  | N | Population ≥1 million (%, 95% CI) | N | Population ≥ 50,000 and < 1 million (%, 95% CI) | N | Micropolitan (%, 95% CI) | N | Noncore (%, 95% CI) |
| Characteristics |  |  |  |  |  |  |  |  |
| US Overall | 45460 | 79.97 (79.26, 80.65) | 43757 | 78.26 (77.53, 78.97) | 20895 | 75.95 (74.82, 77.04) | 20147 | 72.61 (71.34, 73.83) |
| Age group |  |  |  |  |  |  |  |  |
| 50-54 | 8435 | 77.84 (76.26, 79.34) | 7743 | 75.54 (73.83,77.17) | 3629 | 72.84 (70.15, 75.38) | 3429 | 68.60 (65.46, 71.58) |
| 55-59 | 9370 | 78.28 (76.65, 79.82) | 8874 | 76.68 (75.08, 78.21) | 4345 | 75.45 (72.98, 77.76) | 4169 | 72.06 (69.24, 74.71) |
| 60-64 | 10571 | 80.57 (79.08, 81.97) | 9927 | 78.85 (77.37, 80.27) | 4725 | 74.72 (72.31, 76.98) | 4647 | 71.98 (69.32, 74.50) |
| 65-69 | 9368 | 84.47 (83.15, 85.70) | 9608 | 80.33 (78.76, 81.80) | 4468 | 79.16 (76.73, 81.39) | 4331 | 75.94 (73.41, 78.31) |
| 70-74 | 7716 | 80.74 (79.07, 92.30) | 7605 | 82.14 (80.46, 83.70) | 3728 | 79.77 (77.28, 82.05) | 3573 | 76.54 (73.71, 79.15) |
| Race/ethnicity |  |  |  |  |  |  |  |  |
| NH white | 34928 | 78.83 (78.05, 79.58) | 36269 | 78.11 (77.34, 78.85) | 18073 | 76.48 (75.30, 77.62) | 17687 | 72.49 (71.14, 73.81) |
| NH black | 5928 | 84.11 (82.19, 85.85) | 3031 | 83.11 (80.68, 85.28) | 1014 | 81.81 (77.92, 85.13) | 931 | 79.39 (75.27, 82.70) |
| NH AIAN | 297 | 78.22 (69.47, 85.0) | 484 | 69.06 (59.29, 77.38) | 388 | 63.62 (52.96, 73.10) | 687 | 73.63 (65.10, 80.69) |
| NH Asian | 511 | 82.02 (76.27, 86.62) | 618 | 84.08 (77.44, 89.04) | 169 | 86.49 (75.07, 93.16) | 32 | 57.40 c (30.48, 80.54) |
| Other NH race | 807 | 70.48 (63.67, 76.49) | 1028 | 75.67 (68.57, 81.59) | 441 | 74.13 (66.82, 80.31) | 308 | 71.78 (62.43, 79.60) |
| Hispanic | 2420 | 82.04 (79.35, 84.45) | 1923 | 74.49 (70.52, 78.10) | 690 | 58.31 (48.92, 67.12) | 376 | 61.52 (50.37, 71.58) |

a Metropolitan and b nonmetropolitan areas were based on the 2013 6 areas of NCHS urban-rural classification Scheme for counties (12):

1. Large central Metropolitan Statistical Areas (MSA) with population ≥1 million.

2. Large fringe MSA with population ≥1 million.

3. Medium metropolitan counties within MSAs of 250,000-999,999 population.

4. Small metropolitan counties within MSAs of 50,000-249,999 population (small metro).

5. Micropolitan counties with a city of 10,000 or more population).

6. Non-core (non-micropolitan) counties without a city of 10,000 or more population.

We collapsed the metropolitan areas to 2 areas based on population size:

a areas 1 (large central metro) and area 2 (large fringe metro); and areas 3 (medium metro) and area 4 (small metro). b Areas 5 and 6 remained the same.

n=sample size; Percentages are weighted to the study population;  c Estimates should be treated with caution because the relative standard error (RSE)>30% or the sample size is small.

**Table S2**. BRFSS direct estimates of demographic characteristics (unadjusted) for rarely or never having had a mammogram (having the most recent

|  |
| --- |

mammogram ≥5 years before the survey interview or never having it) by NCHS metropolitan and nonmetropolitan county population size

|  | Metropolitan a | | | | Nonmetropolitan b | | | |  |
| --- | --- | --- | --- | --- | --- | --- | --- | --- | --- |
|  | N | Population ≥1 million (%, 95% CI) | N | Population ≥ 50,000 and < 1 million (%, 95% CI) | N | Micropolitan (%, 95% CI) | N | Noncore (%, 95% CI) |
| Characteristics |  |  |  |  |  |  |  |  |
| US Overall | 45460 | 9.61 (9.13, 10.11) | 43757 | 11.48 (10.94, 12.05) | 20895 | 13.42 (12.57, 14.33) | 20147 | 15.36 (14.38, 16.39) |
| Age group |  |  |  |  |  |  |  |  |
| 50-54 | 8435 | 11.0 (9.94, 10.11) | 7743 | 13.41 (12.19, 14.74) | 3629 | 15.21 (13.22, 17.44) | 3429 | 17.03 (14.72, 19.62) |
| 55-59 | 9370 | 10.07 (9.04, 11.20) | 8874 | 12.24 (11.07, 13.52) | 4345 | 14.28 (12.44, 16.34) | 4169 | 15.85 (13.72, 18.25) |
| 60-64 | 10571 | 8.74 (7.82, 9.76) | 9927 | 10.73 ( 9.69, 11.87) | 4725 | 13.94 (12.21, 15.87) | 4647 | 15.39 (13.46, 17.55) |
| 65-69 | 9368 | 7.96 (7.07, 8.94) | 9608 | 9.73 ( 8.65, 10.94) | 4468 | 10.97 (9.33, 12.86) | 4331 | 13.38 (11.51, 15.51) |
| 70-74 | 7716 | 9.43 (8.31, 10.67) | 7605 | 10.21 ( 8.86, 11.73) | 3728 | 11.39 (9.63, 13.41) | 3573 | 14.36 (12.27, 16.74) |
| Race/ethnicity |  |  |  |  |  |  |  |  |
| NH white | 34928 | 10.52 (9.97, 11.1) | 36269 | 11.56 (10.99, 12.16) | 18073 | 12.91 (12.04, 13.85) | 17687 | 15.64 (14.58, 16.76) |
| NH black | 5928 | 6.18 (5.21, 7.33) | 3031 | 8.67 (7.01, 10.67) | 1014 | 9.47 (7.23, 12.31) | 931 | 10.43 (8.01, 13.46) |
| NH AIAN | 297 | 8.87 (4.71, 16.07) | 484 | 17.32 (10.54, 27.12) | 388 | 25.57 (16.72, 37.02) | 687 | 12.97 (8.32, 19.66) |
| NH Asian | 511 | 8.24 (5.38, 12.41) | 618 | 8.62 (5.55, 13.16) | 169 | 5.65 (2.44, 12.55) | 32 | 27.20 c (9.08, 58.30) |
| Other NH race | 807 | 18.34 (13.37, 24.63) | 1028 | 12.02 (8.73, 16.34) | 441 | 14.73 (10.34, 20.57) | 308 | 14.32 (9.21, 21.60) |
| Hispanic | 2420 | 7.89 (6.37, 9.74) | 1923 | 13.56 (10.78, 16.92) | 690 | 26.65 (19.43, 35.36) | 376 | 19.62 (12.69, 29.06) |

a Metropolitan and b nonmetropolitan areas were based on the 2013 6 areas of NCHS urban-rural classification Scheme for counties:

1. Large central Metropolitan Statistical Areas (MSA) with population ≥1 million.

2. Large fringe MSA with population ≥1 million.

3. Medium metropolitan counties within MSAs of 250,000-999,999 population.

4. Small metropolitan counties within MSAs of 50,000-249,999 population (small metro).

5. Micropolitan counties with a city of 10,000 or more population).

6. Non-core (non-micropolitan) counties without a city of 10,000 or more population.

We collapsed the metropolitan areas to 2 areas based on population size:

a areas 1 (large central metro) and area 2 (large fringe metro); and areas 3 (medium metro) and area 4 (small metro). b Areas 5 and 6 remained the same.

Percentages are weighted to the study population; c Estimates should be treated with caution because the relative standard error (RSE)>30% or the sample size is small.
